# Supplementary material for: Size effects and odd–even effects in MoS2 nanosheets: first-principles studies
Source: Royal Society of Chemistry journal article supplement (doi:10.1039/c7cp05402e), 2017-01-01
Supplement: c7cp05402e1.pdf [file c7cp05402e1.pdf]

## Supporting Information

### **First-Principles Studies of Energetics of MoS<sub>2</sub> Nanosheets: Size Effects and Odd-Even Effects**

Paul H. Joo, Jianli Cheng, and Kesong Yang\*

*Department of NanoEngineering, University of California San Diego, 9500 Gilman Drive,  
La Jolla, California, 92093-0448, United States*

\*E-mail: [kesong@ucsd.edu](mailto:kesong@ucsd.edu). Tel: +1-858-534-2514.

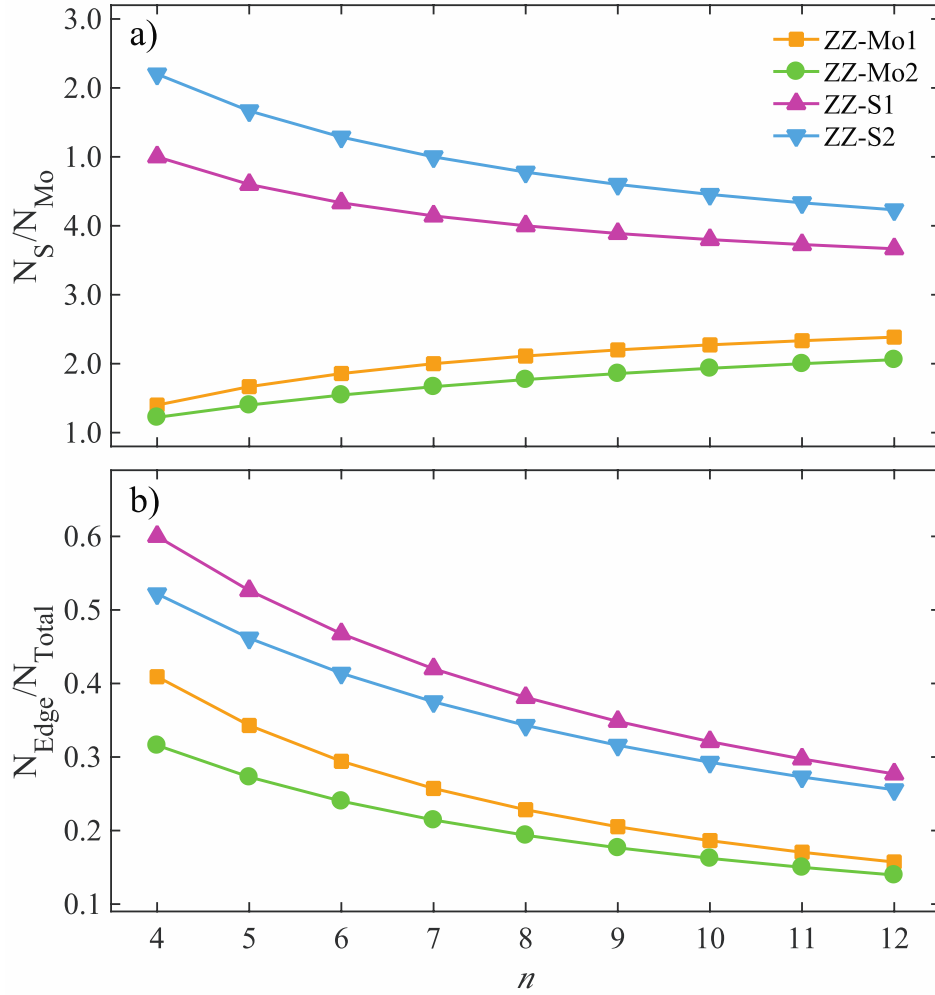

**Figure S1:** Atomic ratio **a)** between the number of S and Mo atoms ( $N_S/N_{Mo}$ ) and **b)** between the number of atoms on the edge and total atoms ( $N_{Edge}/N_{Total}$ ) as a function of the size of the MoS<sub>2</sub> nanosheets,  $n$ .

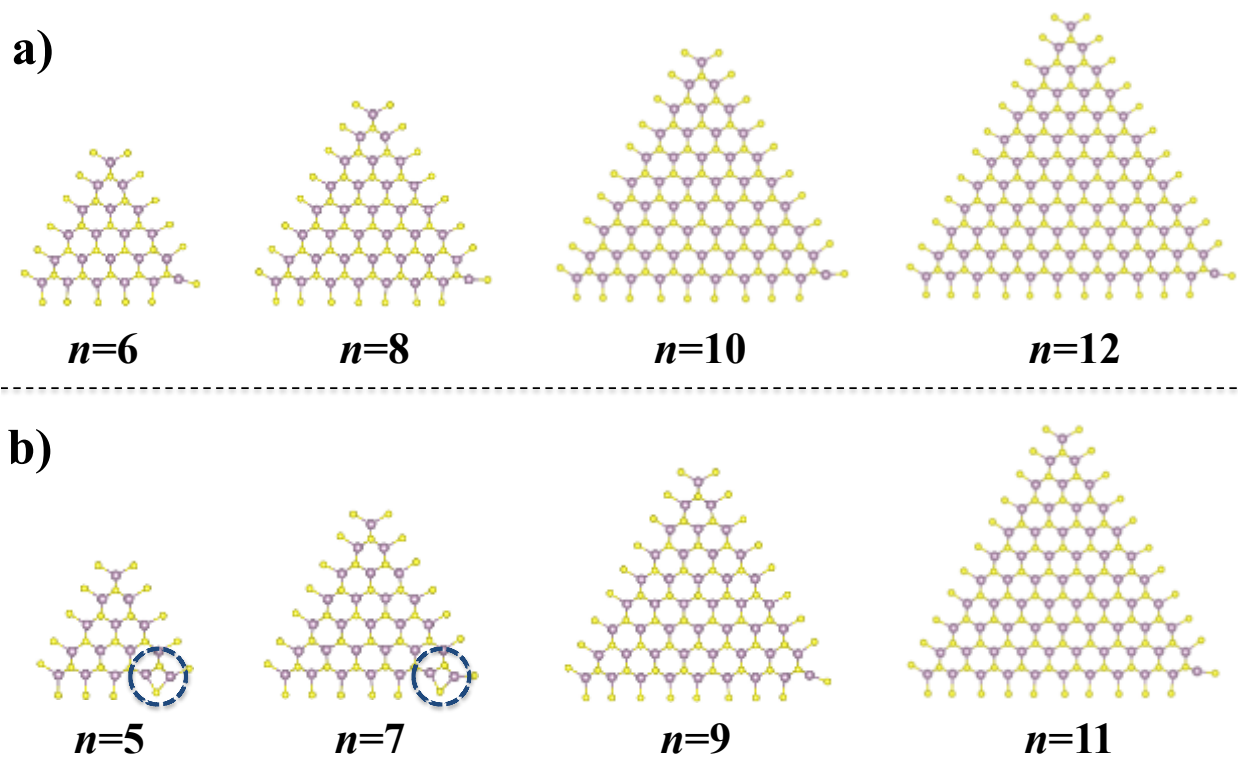

**Figure S2:** Geometrical structures of the relaxed MoS<sub>2</sub> nanosheets with sulfur vacancy at the corner of the edge ( $V_S@Cnr$ ) for **a)** even-number size ( $n = 6, 8, 10,$  and  $12$ ) and **b)** odd-number size ( $n = 5, 7, 9,$  and  $11$ ). The new formed S-Mo bonds between the coordinatively unsaturated sites (Mo atoms with dangling bonds) and its adjacent S dimer are highlighted by the blue circle.

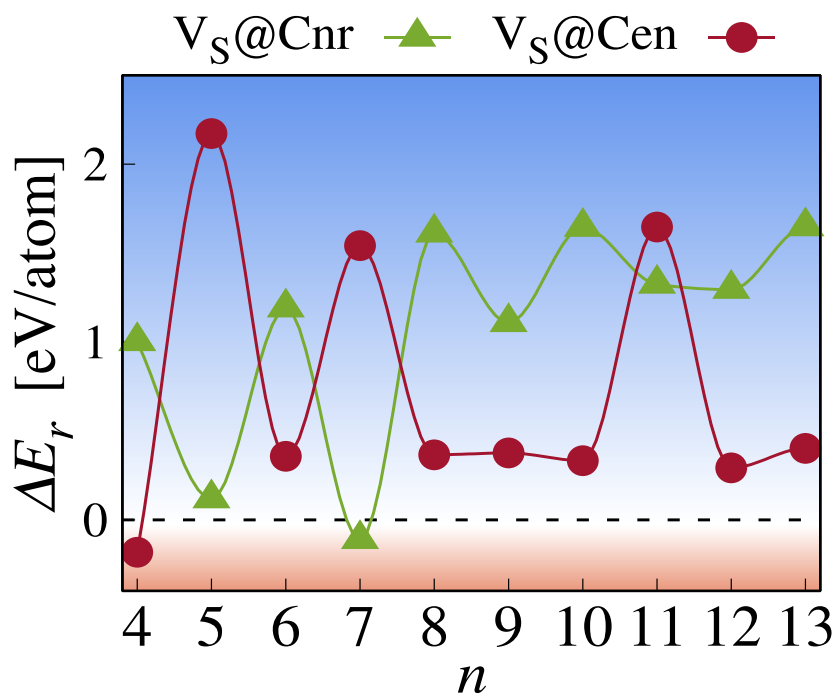

**Figure S3:** Calculated HDS reaction energy ( $\Delta E_r$ ) on the ZZ-S2 type MoS<sub>2</sub> nanosheet as a function of the size ( $n$ ) of the nanosheets. The dash line indicates the  $\Delta E_r$  at zero. Note that calculated final  $\Delta E_r$  shares the same magnitude under S-rich and S-poor conditions, and is independent of sulfur chemical potential.
